# Supplementary material for: Facile-synthesized ultrasmall CuS nanocrystals as drug nanocarriers for highly effective chemo–photothermal combination therapy of cancer
Source: Royal Society of Chemistry journal article supplement (doi:10.1039/c5ra23652e), 2016-01-01
Supplement: c5ra23652e1.pdf [file c5ra23652e1.pdf]

## Supporting Information

### Facile-Synthesized Ultrasmall CuS Nanocrystals as Drug Nanocarriers for Highly Effective Chemo-photothermal Combination Therapy

Xin Wang, Qian Zhan, Li Zou, Huishang Hu, Mengxin Zhang, and Jianwu Dai

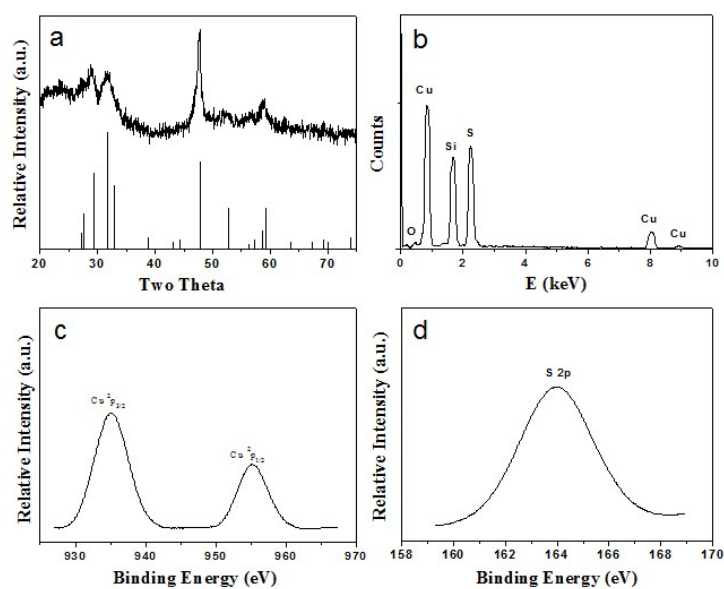

Figure S1. (a) XRD pattern of CuS NCs; (b) EDS of CuS NCs; (c)(d) Cu 2p and S 2p signal in XPS spectrum of CuS NCs.

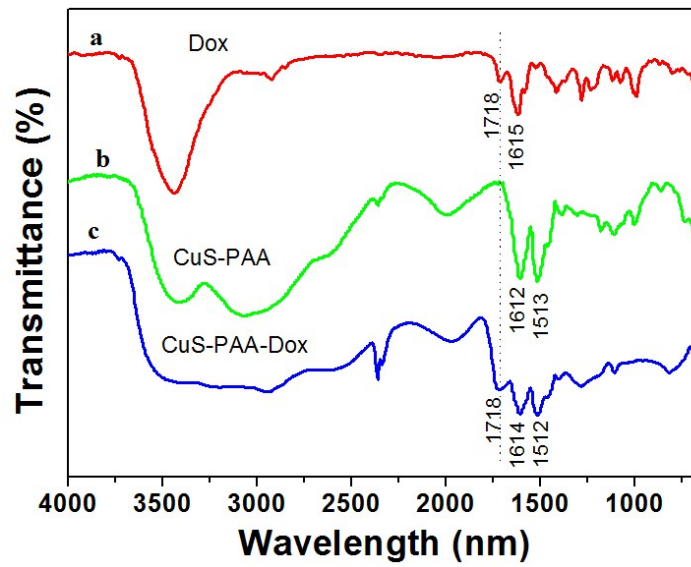

Figure S2. FTIR spectra of Dox(a), CuS-PAA (b), and CuS-PAA-Dox (c).

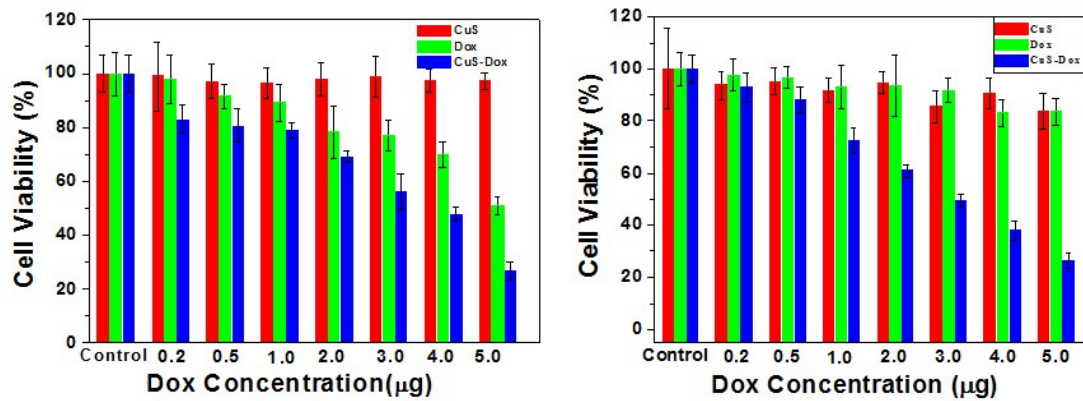

Figure S3. Growth inhibition results for 4T1 and MCF-7 cells treated with CuS NCS, free Dox, and CuS-Dox with concentration of 0-5.0  $\mu\text{g}/\text{mL}$  after 24 h incubation.

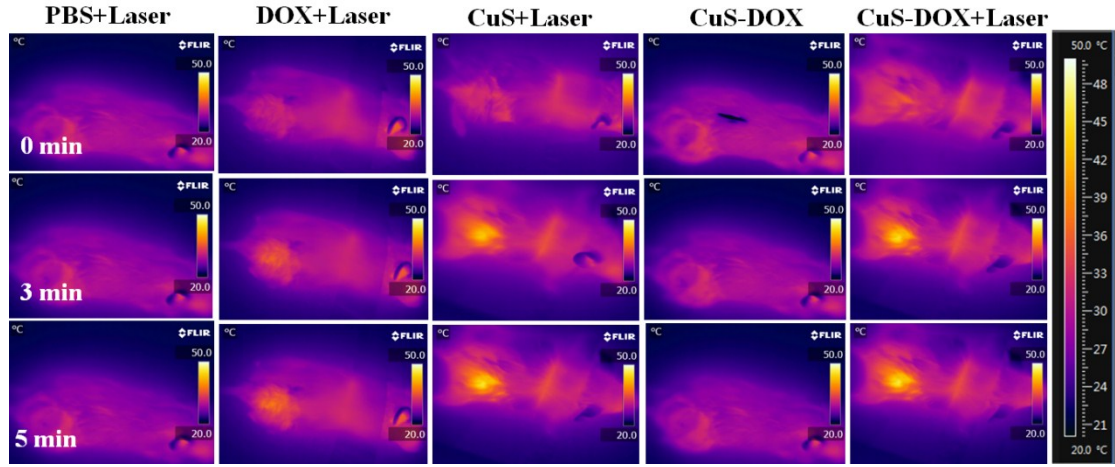

Figure S4. Infrared thermo images of 4T1-tumor-bearing mice with intratumoral injection of PBS, free Dox, CuS, and CuS-Dox under the 808 nm laser irradiation and CuS-Dox without laser irradiation taken at different time intervals. The laser power density was 1.0 W/cm<sup>2</sup>.

### Calculation of the photothermal conversion efficiency

According to Roper's reports, the total energy balance for the system can be expressed by Eq (1):[1]

$$\sum_i m_i C_{p,i} \frac{dT}{dt} = Q_{NC} + Q_{Dis} - Q_{Surr} \quad (1)$$

where  $m$  and  $C_p$  are the mass and heat capacity of water, respectively,  $T$  is the solution temperature,  $Q_{NC}$  is the energy inputted by NCS,  $Q_{Dis}$  is the baseline energy inputted by the sample cell, and  $Q_{surr}$  is heat conduction away from the system surface by air.

The laser-induced source term of  $Q_{NC}$  represents heat dissipated by electron-phonon relaxation of the plasmons on the CuS NCs surface under an 808 nm irradiation:

$$Q_{NC} = I(1 - 10^{-A_{808}})\eta \quad (2)$$

where  $I$  is incident laser power,  $\eta$  is the conversion efficiency from incident laser energy to thermal energy, and  $A_{808}$  is the absorbance of the CuS NCs at the

wavelength of 808 nm. In addition, source term,  $Q_{Dis}$ , expresses heat dissipated from light absorbed by the quartz sample cell itself, and it was measured using a quartz cuvette cell containing pure water without CuS NCs. Furthermore,  $Q_{Surr}$  is linear with temperature for the outgoing thermal energy, as given by Eq 3:

$$Q_{Surr} = hS(T - T_{Surr}) \quad (3)$$

where  $h$  is heat transfer coefficient,  $S$  is the surface area of the container, and  $T_{Surr}$  is ambient temperature of the surroundings.

Once the laser power is defined, the heat input ( $Q_{NC} + Q_{Dis}$ ) will be finite. Since the  $Q_{Surr}$  is increased with the increase of the temperature according to the Eq 3, the system temperature will rise to a maximum when the heat input is equal to heat output:

$$Q_{NC} + Q_{Dis} = Q_{Surr - Max} = hS(T_{Max} - T_{Surr}) \quad (4)$$

As the sample cell reaches the equilibrium temperature, the  $Q_{Surr - Max}$  is heat condition away from the system surface by air, and  $T_{Max}$  is the equilibrium temperature. The 808 nm laser heat conversion efficiency ( $\eta$ ) can be determined by substituting Eq2 for QNC into Eq4 and rearranging to get

$$\eta = \frac{hS(T - T_{Surr}) - Q_{Dis}}{I(1 - 10^{-A_{808}})} \quad (5)$$

Where  $Q_{Dis}$  was measured to be 57.6 mW, the  $(T_{Max} - T_{Surr})$  was 28.6 °C according to Figure 1h,  $I$  is 1.78 W/cm<sup>2</sup>,  $A_{808}$  is the absorbance (0.159) of the CuS NCs at 808 nm (Figure 2a). Thus, to calculate  $\eta$ , the  $hS$  is needed to be known

In order to get the  $hS$ , a dimensionless driving force temperature,  $\theta$  is introduced using the maximum system temperature,  $T_{Max}$

$$\theta = \frac{T - T_{Surr}}{T_{Max} - T_{Surr}} \quad (6)$$

And the  $\tau_s$

$$\tau_s = \frac{\sum_i M_i C_{P,i}}{hS} \quad (7)$$

Which is substituted into Eq 1 and obtained the Eq8

$$\frac{d\theta}{dt} = \frac{1}{\tau} \left[ \frac{Q_{NC} + Q_{Dis}}{hS (T_{Max} - T_{Surr})} - \theta \right] \quad (8)$$

At the cooling stage of the aqueous dispersion of the CuS NCs, the light source was shut off, the  $Q_{NC} + Q_{Dis} = 0$ , yield the Eq. 9

$$\frac{d\theta}{dt} = -\tau_s d_t \quad (9)$$

And integrating, giving the expression

$$t = -\tau_s \ln \theta \quad (10)$$

Therefore, time constant for heat transfer from the system is determined to be  $\tau_s = 213.65$  s by applying the linear time data from the cooling period vs negative natural logarithm of driving force temperature (Figure 1i). In addition, the m is 0.2 g and the C is 4.2 J/g. Thus, according to Eq. 7 the hS is deduced to be 3.93 mJ, substitute to Eq.5, the 808 nm laser heat Conversion efficiency ( $\eta$ ) of the CuS NCs can be calculated to be 19.5%.

#### Reference:

[1] Roper DK, Ahn W, Hoepfner M. Microscale heat transfer transduced by surface plasmon resonant gold nanoparticles. J Phys Chem C. 2007;111:3636-41.
